# Supplementary material for: Selective isolation and eradication of E. coli associated with urinary tract infections using anti-fimbrial modified magnetic reduced graphene oxide nanoheaters
Source: Royal Society of Chemistry journal article supplement (doi:10.1039/c7tb01890h), 2017-01-01
Supplement: c7tb01890h1.pdf [file c7tb01890h1.pdf]

## SUPPLEMENTARY INFORMATION

### Selective isolation of *E. coli* associated with urinary tract infection using anti-fimbrial modified magnetic reduced graphene oxide nanoheaters

Fatima Halouane,<sup>1,2#</sup> Roxana Jijie,<sup>1#</sup> Dalila Meziane,<sup>2</sup> Li Chengnan,<sup>1</sup> Santosh K. Singh,<sup>3</sup> Julie Bouckaert,<sup>4</sup> Jean Jurazek,<sup>5</sup> Sreekumar Kurungot,<sup>3,6</sup> Alexandre Barras,<sup>1</sup> Musen Li,<sup>7</sup> Rabah Boukherroub<sup>1</sup> and Sabine Szunerits<sup>1\*</sup>

<sup>1</sup>*Univ. Lille, CNRS, Centrale Lille, ISEN, Univ. Valenciennes, UMR 8520 - IEMN, F-59000 Lille, France*

<sup>2</sup>*Département de Chimie, Faculté des Sciences, Université Mouloud Mammeri, B.P N\_17 RP, 15000 Tizi Ouzou, Algeria*

<sup>7</sup>*Key Laboratory for Liquid-Solid Structural Evolution and Processing of Materials (Ministry of Education), Shandong University, Jinan 250061, China*

<sup>3</sup>*Physical and Materials Chemistry Division, CSIR-National Chemical Laboratory, Dr. Homi Bhabha Road, Pune 411008, India*

<sup>4</sup>*Unité de Glycobiologie Structurale et Fonctionnelle (UGSF), UMR 8576 du CNRS et Université Lille, 50 Av. de Halley, 59658 Villeneuve d'Ascq, France*

<sup>5</sup>*Laboratoire Groupe de Physique des Matériaux (GPM); UMR6634 CNRS-Université de Rouen-INSA de Rouen; Avenue de l'Université BP12; F-76801 Saint Etienne du Rouvray cedex*

<sup>6</sup>*Academy of Scientific and Innovative Research, Anusandhan Bhawan, 2 Rafi Marg, New Delhi 110 001, India*

---

<sup>#</sup>equal contribution

\*To whom correspondence should be send to: [sabine.szunerits@univ-lille1.fr](mailto:sabine.szunerits@univ-lille1.fr)

### Fabrication of chitosan modified magnetic particles (MP<sub>CS</sub>)

FeCl<sub>2</sub>×4H<sub>2</sub>O (0.34 g, 1.7 mmol) and FeCl<sub>3</sub>×6H<sub>2</sub>O (0.95 g, 3.5 mmol) were dissolved in deaerated water (20 mL) and subsequently added to a nitrogen-protected three-necked flask under sonication. The resulting mixture was heated at 50°C for 30 min. Then concentrated ammonium hydroxide (2 mL) was added dropwise and kept at 50°C for 30 min. The system was finally cooled to room temperature and the solid product was isolated *via* a non-uniform magnetic field generated by a Nd–Fe–B permanent magnet. The resulting Fe<sub>3</sub>O<sub>4</sub> particles (MP) were washed six times with Milli-Q water to remove unreacted chemicals and then stored in water.

A water dispersion of bare MP (10 mg mL<sup>-1</sup>, 1 mL) was mixed with chitosan (20 mg) and sonicated for 1 h at room temperature. The formed magnetic particles (MP<sub>CS</sub>) were isolated by means of magnet and purified through six consecutive wash/precipitation cycles with water to ensure complete removal of unreacted chitosan. The precipitate was dried in an oven at 50°C.

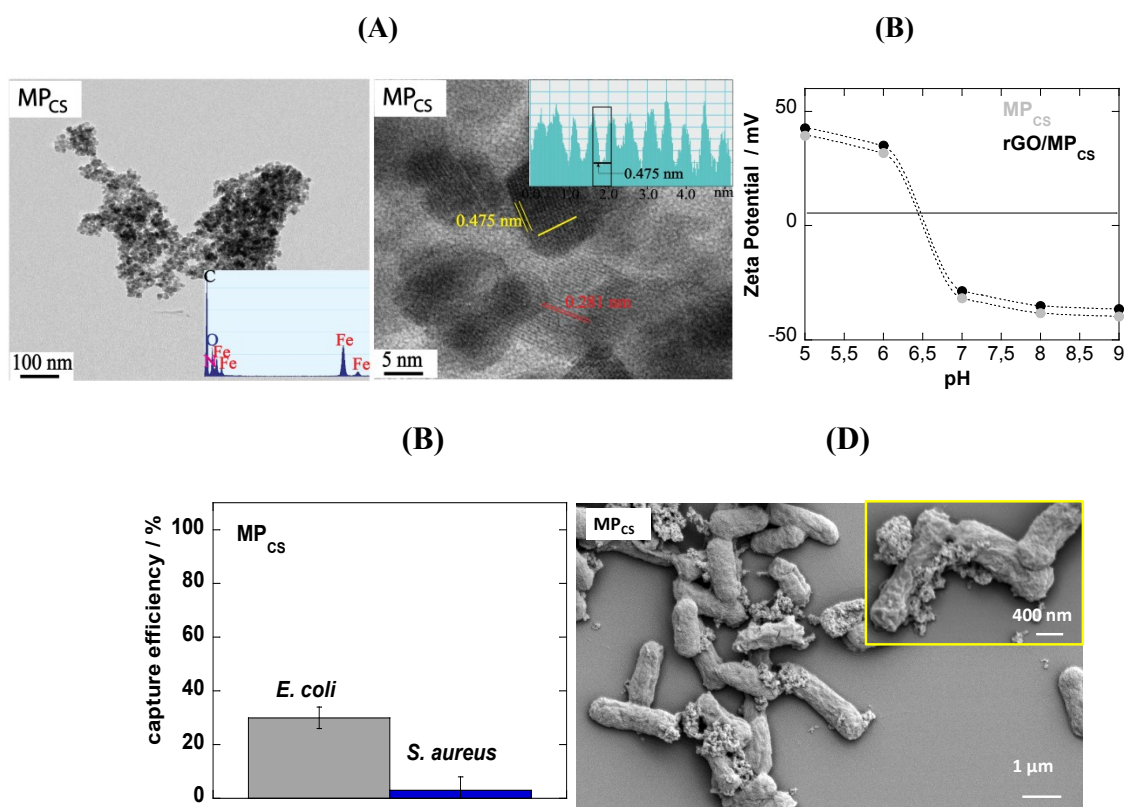

**Figure S1:** (A) Transmission electron microscopy images and HRTEM analysis of chitosan modified particles (Inset: EDAX analysis displaying the different elements present in the sample), (B) Zeta potential of MP<sub>CS</sub> and rGO/MP<sub>CS</sub> as a function of solution pH; (C) Removal efficiency of rGO/MP<sub>CS</sub> (500 μg mL<sup>-1</sup>) for *E. coli* and *S. aureus* (1×10<sup>9</sup> cfu mL<sup>-1</sup>); (D) SEM images of MP<sub>CS</sub> nanoparticles mediated bacteria isolation.
